# Supplementary material for: A substrate descriptor based approach for the prediction and understanding of the regioselectivity in caged catalyzed hydroformylation
Source: Royal Society of Chemistry journal article supplement (doi:10.1039/d3fd00023k), 2023-01-01
Supplement: d3fd00023k1.pdf [file d3fd00023k1.pdf]

Supporting info:

## A Substrate Descriptor Based Approach for the prediction of the Regioselectivity of hydroformylation

Pim R. Linnebank,<sup>a</sup> David Poole,<sup>a</sup> Alexander M. Kluwer<sup>b</sup> and Joost N. H. Reek<sup>a,b</sup>

All DFT calculations were performed with the Amsterdam Density Functional<sup>1,2</sup> (ADF) program. The BLYP-D3(BJ)<sup>3,4</sup> density functional was used together with a small core TZ2P basis set. Relativistic effects were accounted for by running calculations with zeroth-order regular approximation (ZORA).<sup>5-7</sup> All local minima were characterized by having zero imaginary frequencies after running a frequency calculation. Also, these XYZ coordinates were used to calculate the Sterimol parameters.<sup>8</sup> To determine the computer-aided drug design (CADD) descriptors, RDKit: Open-source cheminformatics; <http://www.rdkit.org> was used.<sup>9</sup>

### Substrate details

| CAS        | <i>st_L</i> | <i>st_B1</i> | <i>st_B5</i> | <i>int<sub>R</sub>(C=C)</i> | $\Delta^{13}C$ shift | $\Delta\Delta E$ CAT1 | $\Delta\Delta E$ CAT2 | $\Delta\Delta E$ cage_effect |
|------------|-------------|--------------|--------------|-----------------------------|----------------------|-----------------------|-----------------------|------------------------------|
| 2114-42-3  | 4.75        | 1.81         | 6.33         | 13.13                       | 22.5                 | -0.78                 | 0.55                  | 1.33                         |
| 3724-55-8  | 4.75        | 1.85         | 4.52         | 13.36                       | 11.6                 | -0.92                 | 0.14                  | 1.07                         |
| 818-57-5   | 4.75        | 1.81         | 3.72         | 15.65                       | 21.2                 | -0.45                 | 0.45                  | 0.90                         |
| 109-49-9   | 4.75        | 1.82         | 4.63         | 20.21                       | 21.9                 | -0.41                 | 0.54                  | 0.96                         |
| 591-87-7   | 4.74        | 1.85         | 4.66         | 4.310                       | 14.4                 | -0.67                 | -0.31                 | 0.36                         |
| 1746-13-0  | 4.76        | 1.88         | 5.34         | 5.660                       | 18.7                 | -0.35                 | -0.12                 | 0.24                         |
| 300-57-2   | 4.75        | 1.84         | 6.02         | 16.75                       | 21.7                 | -0.61                 | 0.52                  | 1.13                         |
| 4696-30-4  | 4.75        | 1.8          | 4.36         | 14.61                       | 18.9                 | -0.64                 | 0.57                  | 1.21                         |
| 1736-60-3  | 4.75        | 1.81         | 6.66         | 13.59                       | 15.8                 | -0.51                 | 0.05                  | 0.56                         |
| 768-56-9   | 4.75        | 1.82         | 3.61         | 19.88                       | 23.1                 | -0.39                 | 0.57                  | 0.96                         |
| 111-66-0   | 4.75        | 1.83         | 5.92         | 20.13                       | 25.1                 | -0.34                 | 0.63                  | 0.97                         |
| 1587-04-8  | 4.75        | 1.8          | 4.36         | 18.8                        | 21.0                 | -0.67                 | 0.53                  | 1.21                         |
| 3333-20-8  | 4.75        | 1.84         | 6.3          | 16.07                       | 22.0                 | -0.41                 | 0.59                  | 1.00                         |
| 3333-13-9  | 4.75        | 1.84         | 7.06         | 18.97                       | 21.4                 | -0.78                 | 0.61                  | 1.38                         |
| 3698-28-0  | 4.75        | 1.84         | 6.03         | 19.79                       | 26.7                 | -0.38                 | 0.59                  | 0.97                         |
| 61142-41-4 | 4.75        | 2.48         | 4.00         | 19.48                       | 34.8                 | 0.45                  | 1.04                  | 0.59                         |
| 140-67-0   | 4.75        | 1.84         | 7.84         | 21.85                       | 22.6                 | -0.73                 | 0.64                  | 1.38                         |
| 77446-17-4 | 4.76        | 1.84         | 6.73         | 16.18                       | 22.2                 | -0.2                  | 0.57                  | 0.77                         |
| 4810-05-3  | 4.76        | 1.87         | 7.17         | 21.55                       | 21.9                 | -1.26                 | 0.58                  | 1.83                         |
| 2489-86-3  | 4.75        | 1.89         | 7.26         | 14.12                       | 20.8                 | -0.38                 | 0.44                  | 0.82                         |
| 3524-73-0  | 4.75        | 1.82         | 4.62         | 20.75                       | 25.2                 | -0.36                 | 0.68                  | 1.05                         |
| 2489-87-4  | 4.75        | 1.84         | 8.28         | 17.04                       | 21.3                 | -0.73                 | 0.49                  | 1.23                         |
| 557-31-3   | 4.75        | 1.89         | 4.54         | 4.370                       | 18.6                 | -0.38                 | 0.14                  | 0.52                         |
| 3739-64-8  | 4.75        | 1.89         | 6.18         | 4.410                       | 18.7                 | -0.33                 | 0.17                  | 0.50                         |
| 3840-33-3  | 4.75        | 1.86         | 7.15         | 19.33                       | 20.7                 | -0.69                 | 0.57                  | 1.26                         |
| 1587-05-9  | 4.76        | 1.87         | 6.06         | 19.13                       | 20.5                 | -1.02                 | 0.47                  | 1.48                         |
| 1813-97-4  | 4.75        | 1.83         | 7.63         | 13.59                       | 19.7                 | -1.12                 | 0.33                  | 1.46                         |
| 93-15-2    | 4.75        | 1.84         | 8.25         | 17.30                       | 18.7                 | -0.39                 | 0.57                  | 0.96                         |
| 30984-53-3 | 4.75        | 1.84         | 6.22         | 13.65                       | 21.4                 | -0.66                 | 0.41                  | 1.07                         |
| 487-11-6   | 4.75        | 1.84         | 8.25         | 14.31                       | 21.2                 | -0.38                 | 0.53                  | 0.91                         |
| 3840-17-3  | 4.75        | 1.84         | 7.04         | 14.34                       | 19.1                 | -0.59                 | 0.36                  | 0.95                         |
| 3769-23-1  | 4.75        | 1.79         | 4.44         | 16.94                       | 22.3                 | -0.51                 | 0.54                  | 1.06                         |
| 42918-20-7 | 4.75        | 1.83         | 6.09         | 14.31                       | 19.0                 | -0.69                 | 0.38                  | 1.07                         |
| 24743-14-4 | 4.75        | 1.84         | 7.00         | 12.10                       | 21.3                 | -0.42                 | 0.52                  | 0.94                         |
| 1737-16-2  | 4.75        | 1.84         | 7.00         | 18.36                       | 21.4                 | -0.82                 | 0.50                  | 1.32                         |
| 3404-61-3  | 4.76        | 2.43         | 4.70         | 16.88                       | 32.9                 | 0.12                  | 1.05                  | 0.93                         |
| 691-37-2   | 4.76        | 1.84         | 4.43         | 16.23                       | 22.4                 | -0.43                 | 0.54                  | 0.97                         |

|           |      |      |      |       |      |       |      |      |
|-----------|------|------|------|-------|------|-------|------|------|
| 762-62-9  | 4.75 | 1.8  | 4.42 | 14.20 | 19.6 | -0.49 | 0.25 | 0.73 |
| 3742-34-5 | 4.76 | 2.43 | 3.29 | 23.36 | 31.6 | -0.47 | 0.91 | 1.38 |
| 695-12-5  | 4.76 | 2.45 | 3.50 | 20.24 | 33.3 | -0.11 | 1.02 | 1.13 |
| 3524-75-2 | 4.75 | 1.79 | 5.71 | 11.60 | 23.9 | -0.56 | 0.62 | 1.18 |

## Computer-aided drug design descriptors of substrates

| CAS           | $K_1$          | $K_2$ | $K_3$ | $L$ -SASA | Eccentricity | Alpha |
|---------------|----------------|-------|-------|-----------|--------------|-------|
| 3524-73-0     | 0.57           | 3.91  | 5.74  | 65.91     | 0.98         | -0.26 |
| 3769-23-1     | 0.57           | 3.91  | 3.57  | 65.91     | 0.97         | -0.26 |
| 3404-61-3     | 0.57           | 3.91  | 3.57  | 65.91     | 0.97         | -0.26 |
| 111-66-0      | 0.68           | 6.74  | 5.74  | 75.08     | 0.99         | -0.26 |
| 691-37-2      | 0.46           | 2.95  | 3.74  | 56.73     | 0.97         | -0.26 |
| 762-62-9      | 0.57           | 2.15  | 5.74  | 65.91     | 0.91         | -0.26 |
| 3742-34-5     | 0.63           | 2.15  | 1.05  | 62.09     | 0.97         | -0.26 |
| 695-12-5      | 0.74           | 2.91  | 1.36  | 71.27     | 0.95         | -0.26 |
| 61142-41-4    | 0.97           | 4.54  | 2.55  | 89.62     | 0.91         | -0.26 |
| 3524-75-2     | 0.74           | 2.91  | 1.36  | 71.27     | 0.95         | -0.26 |
| 2114-42-3     | 0.86           | 3.71  | 2.21  | 80.44     | 0.96         | -0.26 |
| 3724-55-8     | 0.97           | 3.40  | 3.03  | 54.02     | 0.95         | -0.79 |
| 818-57-5      | 1.06           | 4.37  | 3.40  | 63.20     | 0.97         | -0.79 |
| 300-57-2      | 1.20           | 3.08  | 1.73  | 69.89     | 0.96         | -1.04 |
| 1736-60-3     | 5.48           | 3.77  | 1.49  | 83.69     | 0.90         | -1.39 |
| 768-56-9      | 1.29           | 3.89  | 2.06  | 79.06     | 0.99         | -1.04 |
| 591-87-7      | 0.97           | 3.40  | 5.21  | 54.02     | 0.98         | -0.79 |
| 1746-13-0     | 1.50           | 3.72  | 1.94  | 75.00     | 0.99         | -1.24 |
| 109-49-9      | 0.79           | 3.59  | 5.41  | 58.09     | 0.99         | -0.59 |
| 4810-05-3     | 1.50           | 3.57  | 1.76  | 97.41     | 0.92         | -1.04 |
| 2489-86-3     | 2.09           | 3.44  | 1.48  | 95.38     | 0.92         | -1.56 |
| 2489-87-4     | 2.09           | 3.44  | 1.62  | 95.38     | 0.98         | -1.56 |
| 4696-30-4     | 0.58           | 4.70  | 3.70  | 52.67     | 0.97         | -0.30 |
| 1587-04-8     | 1.29           | 3.21  | 1.47  | 79.06     | 0.92         | -1.04 |
| 3333-20-8     | 1.29           | 3.21  | 1.73  | 79.06     | 0.95         | -1.04 |
| 3333-13-9     | 1.29           | 3.21  | 1.73  | 79.06     | 0.98         | -1.04 |
| 140-67-0      | 1.58           | 3.81  | 2.11  | 84.17     | 0.98         | -1.24 |
| 3698-28-0     | 1.58           | 3.81  | 1.84  | 84.17     | 0.86         | -1.24 |
| 77446-17-4    | 1.39           | 3.38  | 2.23  | 88.24     | 0.92         | -1.04 |
| 24743-14-4    | 1.58           | 3.81  | 2.11  | 84.17     | 0.95         | -1.24 |
| 1737-16-2     | 1.73           | 3.16  | 1.69  | 72.65     | 0.98         | -1.11 |
| 1587-05-9     | 1.39           | 3.38  | 1.70  | 88.24     | 0.92         | -1.04 |
| 3840-33-3     | 1.39           | 3.38  | 1.94  | 88.24     | 0.97         | -1.04 |
| 1813-97-4     | 3.15           | 3.64  | 2.61  | 87.34     | 0.98         | -1.25 |
| 93-15-2       | 1.97           | 4.55  | 2.25  | 98.46     | 0.94         | -1.44 |
| 557-31-3      | 0.58           | 4.70  | 3.70  | 52.67     | 0.99         | -0.30 |
| 3739-64-8     | 0.81           | 6.70  | 5.70  | 71.02     | 0.99         | -0.30 |
| 30984-53-3    | 1.73           | 3.16  | 1.69  | 72.65     | 0.96         | -1.11 |
| 487-11-6      | 2.37           | 5.29  | 2.43  | 112.75    | 0.89         | -1.64 |
| 3840-17-3     | 1.89           | 3.43  | 1.89  | 78.78     | 0.96         | -0.75 |
| 42918-20-7    | 1.98           | 3.57  | 1.71  | 82.35     | 0.88         | -0.56 |
|               | R <sup>2</sup> |       |       |           |              |       |
| Free Catalyst | 0.094          | 0.005 | 0.052 | 0.035     | 0.008        | 0.068 |
| Cage Catalyst | 0.058          | 0.070 | 0.043 | 0.005     | 0.005        | 0.102 |
| Cage Effect   | 0.001          | 0.095 | 0.153 | 0.052     | 0.000        | 0.007 |

| CAS           | PBF            | PMI1   | PMI2    | PMI3    | Φ     | RadGyr |
|---------------|----------------|--------|---------|---------|-------|--------|
| 3524-73-0     | 0.55           | 92.03  | 425.43  | 486.57  | 0.32  | 2.25   |
| 3769-23-1     | 0.78           | 102.34 | 323.02  | 413.28  | 0.32  | 2.09   |
| 3404-61-3     | 0.63           | 130.56 | 306.80  | 363.31  | 0.32  | 2.09   |
| 111-66-0      | 0.82           | 111.21 | 778.28  | 600.56  | 0.57  | 2.55   |
| 691-37-2      | 0.75           | 76.12  | 247.73  | 274.01  | 0.23  | 1.89   |
| 762-62-9      | 0.84           | 126.83 | 300.12  | 308.51  | 0.18  | 1.94   |
| 3742-34-5     | 0.74           | 100.53 | 296.51  | 346.82  | 0.19  | 1.95   |
| 695-12-5      | 0.74           | 134.99 | 350.71  | 451.74  | 0.27  | 2.03   |
| 61142-41-4    | 0.75           | 241.97 | 568.85  | 717.83  | 0.44  | 2.30   |
| 3524-75-2     | 0.75           | 112.00 | 418.46  | 486.73  | 0.27  | 2.15   |
| 2114-42-3     | 0.81           | 150.42 | 547.78  | 560.43  | 0.35  | 2.30   |
| 3724-55-8     | 0.69           | 100.03 | 325.47  | 345.56  | 0.47  | 1.94   |
| 818-57-5      | 0.61           | 87.17  | 563.03  | 473.73  | 0.58  | 2.37   |
| 300-57-2      | 0.66           | 145.99 | 459.50  | 518.98  | 0.41  | 2.18   |
| 1736-60-3     | 0.68           | 579.76 | 862.45  | 1315.66 | 1.48  | 2.57   |
| 768-56-9      | 0.47           | 189.99 | 591.94  | 886.93  | 0.50  | 2.62   |
| 591-87-7      | 0.52           | 99.81  | 322.83  | 431.27  | 0.47  | 2.11   |
| 1746-13-0     | 0.42           | 120.86 | 782.01  | 876.11  | 0.56  | 2.57   |
| 109-49-9      | 0.62           | 75.53  | 401.17  | 446.17  | 0.41  | 2.19   |
| 4810-05-3     | 0.54           | 329.30 | 806.50  | 1062.58 | 0.45  | 2.62   |
| 2489-86-3     | 0.47           | 407.82 | 846.26  | 1109.86 | 0.55  | 2.62   |
| 2489-87-4     | 0.61           | 263.17 | 1039.72 | 1203.78 | 0.55  | 2.85   |
| 4696-30-4     | 0.51           | 68.41  | 337.77  | 342.44  | 0.46  | 1.87   |
| 1587-04-8     | 0.67           | 246.66 | 527.48  | 675.82  | 0.41  | 2.31   |
| 3333-20-8     | 0.66           | 221.45 | 558.47  | 691.69  | 0.41  | 2.36   |
| 3333-13-9     | 0.71           | 157.73 | 688.11  | 729.18  | 0.41  | 2.43   |
| 140-67-0      | 0.70           | 171.72 | 927.73  | 995.31  | 0.55  | 2.67   |
| 3698-28-0     | 0.67           | 395.80 | 479.17  | 766.33  | 0.55  | 2.35   |
| 77446-17-4    | 0.65           | 344.54 | 624.72  | 865.47  | 0.43  | 2.51   |
| 24743-14-4    | 0.65           | 225.60 | 708.33  | 899.69  | 0.55  | 2.58   |
| 1737-16-2     | 0.67           | 154.13 | 695.86  | 749.59  | 0.55  | 2.42   |
| 1587-05-9     | 0.57           | 321.34 | 562.01  | 720.09  | 0.43  | 2.42   |
| 3840-33-3     | 0.66           | 260.71 | 685.14  | 942.26  | 0.43  | 2.47   |
| 1813-97-4     | 0.70           | 221.36 | 1361.26 | 1414.43 | 0.88  | 2.86   |
| 93-15-2       | 0.68           | 454.00 | 987.10  | 1328.15 | 0.69  | 2.78   |
| 557-31-3      | 0.48           | 66.14  | 271.36  | 341.13  | 0.46  | 2.06   |
| 3739-64-8     | 0.65           | 79.35  | 684.38  | 820.34  | 0.68  | 2.52   |
| 30984-53-3    | 0.66           | 219.21 | 571.48  | 704.20  | 0.55  | 2.34   |
| 487-11-6      | 0.64           | 774.39 | 1058.18 | 1704.39 | 0.84  | 2.91   |
| 3840-17-3     | 0.66           | 265.46 | 775.24  | 909.48  | 0.65  | 2.52   |
| 42918-20-7    | 0.67           | 459.18 | 599.09  | 959.90  | 0.71  | 2.26   |
|               | R <sup>2</sup> |        |         |         |       |        |
| Free Catalyst | 0.130          | 0.000  | 0.014   | 0.014   | 0.168 | 0.009  |
| Cage Catalyst | 0.004          | 0.001  | 0.076   | 0.035   | 0.018 | 0.029  |
| Cage Effect   | 0.059          | 0.000  | 0.027   | 0.006   | 0.049 | 0.006  |

| CAS           | Sphericity     | Asphericity | $\chi_{0n}$ | $X_{1n}$ | $X_{2n}$ | $\chi_{3n}$ |
|---------------|----------------|-------------|-------------|----------|----------|-------------|
| 3524-73-0     | 0.36           | 0.39        | 17.50       | 8.50     | 0.75     | 0.25        |
| 3769-23-1     | 0.44           | 0.30        | 17.50       | 8.50     | 0.75     | 0.31        |
| 3404-61-3     | 0.44           | 0.33        | 17.50       | 8.50     | 0.75     | 0.31        |
| 111-66-0      | 0.27           | 0.64        | 20.00       | 9.75     | 0.75     | 0.31        |
| 691-37-2      | 0.44           | 0.41        | 15.00       | 7.25     | 0.63     | 0.19        |
| 762-62-9      | 0.61           | 0.23        | 17.50       | 8.50     | 1.00     | 0.25        |
| 3742-34-5     | 0.30           | 0.44        | 15.50       | 7.75     | 1.00     | 0.56        |
| 695-12-5      | 0.33           | 0.37        | 18.00       | 9.00     | 1.13     | 0.63        |
| 61142-41-4    | 0.79           | 0.14        | 23.00       | 11.50    | 1.38     | 0.75        |
| 3524-75-2     | 0.38           | 0.46        | 18.00       | 9.00     | 1.13     | 0.63        |
| 2114-42-3     | 0.31           | 0.43        | 20.50       | 10.25    | 1.25     | 0.69        |
| 3724-55-8     | 0.25           | 0.33        | 11.32       | 5.36     | 0.64     | 0.26        |
| 818-57-5      | 0.32           | 0.58        | 13.82       | 6.61     | 0.76     | 0.32        |
| 300-57-2      | 0.31           | 0.38        | 14.50       | 7.25     | 1.25     | 0.69        |
| 1736-60-3     | 0.31           | 0.22        | 11.39       | 5.69     | 2.19     | 1.40        |
| 768-56-9      | 0.13           | 0.63        | 17.00       | 8.50     | 1.38     | 0.75        |
| 591-87-7      | 0.34           | 0.41        | 11.32       | 5.36     | 0.62     | 0.19        |
| 1746-13-0     | 0.10           | 0.64        | 14.91       | 7.41     | 1.28     | 0.68        |
| 109-49-9      | 0.41           | 0.56        | 13.41       | 6.45     | 0.70     | 0.24        |
| 4810-05-3     | 0.18           | 0.34        | 22.00       | 11.00    | 2.00     | 1.19        |
| 2489-86-3     | 0.13           | 0.24        | 18.50       | 9.50     | 2.25     | 1.50        |
| 2489-87-4     | 0.18           | 0.50        | 18.50       | 9.50     | 2.25     | 1.44        |
| 4696-30-4     | 0.38           | 0.41        | 12.91       | 6.16     | 0.45     | 0.16        |
| 1587-04-8     | 0.28           | 0.34        | 17.00       | 8.50     | 1.50     | 0.88        |
| 3333-20-8     | 0.25           | 0.32        | 17.00       | 8.50     | 1.50     | 0.81        |
| 3333-13-9     | 0.26           | 0.49        | 17.00       | 8.50     | 1.50     | 0.81        |
| 140-67-0      | 0.21           | 0.56        | 17.41       | 8.66     | 1.56     | 0.89        |
| 3698-28-0     | 0.25           | 0.18        | 17.41       | 8.66     | 1.56     | 0.94        |
| 77446-17-4    | 0.23           | 0.24        | 19.50       | 9.75     | 1.75     | 0.94        |
| 24743-14-4    | 0.23           | 0.29        | 17.41       | 8.66     | 1.56     | 0.89        |
| 1737-16-2     | 0.31           | 0.51        | 13.88       | 6.94     | 1.44     | 0.78        |
| 1587-05-9     | 0.20           | 0.26        | 19.50       | 9.75     | 1.75     | 1.06        |
| 3840-33-3     | 0.28           | 0.34        | 19.50       | 9.75     | 1.75     | 1.00        |
| 1813-97-4     | 0.27           | 0.56        | 15.13       | 7.57     | 2.00     | 1.10        |
| 93-15-2       | 0.20           | 0.30        | 20.32       | 10.07    | 1.86     | 1.14        |
| 557-31-3      | 0.31           | 0.63        | 12.91       | 6.16     | 0.43     | 0.15        |
| 3739-64-8     | 0.21           | 0.64        | 17.91       | 8.66     | 0.68     | 0.27        |
| 30984-53-3    | 0.31           | 0.34        | 13.88       | 6.94     | 1.44     | 0.78        |
| 487-11-6      | 0.17           | 0.21        | 23.22       | 11.47    | 2.17     | 1.38        |
| 3840-17-3     | 0.31           | 0.40        | 13.88       | 6.94     | 1.44     | 0.78        |
| 42918-20-7    | 0.31           | 0.20        | 13.88       | 6.94     | 1.44     | 0.83        |
|               | R <sup>2</sup> |             |             |          |          |             |
| Free Catalyst | 0.086          | 0.044       | 0.290       | 0.292    | 0.002    | 0.004       |
| Cage Catalyst | 0.189          | 0.025       | 0.051       | 0.042    | 0.060    | 0.052       |
| Cage Effect   | 0.027          | 0.001       | 0.058       | 0.070    | 0.075    | 0.074       |

| CAS           | $\chi_{0v}$    | $\chi_{1v}$ | $\chi_{2v}$ | $\chi_{3v}$ |
|---------------|----------------|-------------|-------------|-------------|
| 3524-73-0     | 3.50           | 1.50        | 0.75        | 0.25        |
| 3769-23-1     | 3.50           | 1.50        | 0.75        | 0.31        |
| 3404-61-3     | 3.50           | 1.50        | 0.75        | 0.31        |
| 111-66-0      | 4.00           | 1.75        | 0.75        | 0.31        |
| 691-37-2      | 3.00           | 1.25        | 0.63        | 0.19        |
| 762-62-9      | 3.50           | 1.50        | 1.00        | 0.25        |
| 3742-34-5     | 3.50           | 1.75        | 1.00        | 0.56        |
| 695-12-5      | 4.00           | 2.00        | 1.13        | 0.63        |
| 61142-41-4    | 5.00           | 2.50        | 1.38        | 0.75        |
| 3524-75-2     | 4.00           | 2.00        | 1.13        | 0.63        |
| 2114-42-3     | 4.50           | 2.25        | 1.25        | 0.69        |
| 3724-55-8     | 3.32           | 1.36        | 0.64        | 0.26        |
| 818-57-5      | 3.82           | 1.61        | 0.76        | 0.32        |
| 300-57-2      | 4.50           | 2.25        | 1.25        | 0.69        |
| 1736-60-3     | 6.39           | 3.19        | 2.19        | 1.40        |
| 768-56-9      | 5.00           | 2.50        | 1.38        | 0.75        |
| 591-87-7      | 3.32           | 1.36        | 0.62        | 0.19        |
| 1746-13-0     | 4.91           | 2.41        | 1.28        | 0.68        |
| 109-49-9      | 3.41           | 1.45        | 0.70        | 0.24        |
| 4810-05-3     | 6.00           | 3.00        | 2.00        | 1.19        |
| 2489-86-3     | 6.50           | 3.50        | 2.25        | 1.50        |
| 2489-87-4     | 6.50           | 3.50        | 2.25        | 1.44        |
| 4696-30-4     | 2.91           | 1.16        | 0.45        | 0.16        |
| 1587-04-8     | 5.00           | 2.50        | 1.50        | 0.88        |
| 3333-20-8     | 5.00           | 2.50        | 1.50        | 0.81        |
| 3333-13-9     | 5.00           | 2.50        | 1.50        | 0.81        |
| 140-67-0      | 5.41           | 2.66        | 1.56        | 0.89        |
| 3698-28-0     | 5.41           | 2.66        | 1.56        | 0.94        |
| 77446-17-4    | 5.50           | 2.75        | 1.75        | 0.94        |
| 24743-14-4    | 5.41           | 2.66        | 1.56        | 0.89        |
| 1737-16-2     | 4.88           | 2.44        | 1.44        | 0.78        |
| 1587-05-9     | 5.50           | 2.75        | 1.75        | 1.06        |
| 3840-33-3     | 5.50           | 2.75        | 1.75        | 1.00        |
| 1813-97-4     | 6.13           | 3.07        | 2.00        | 1.10        |
| 93-15-2       | 6.32           | 3.07        | 1.86        | 1.14        |
| 557-31-3      | 2.91           | 1.16        | 0.43        | 0.15        |
| 3739-64-8     | 3.91           | 1.66        | 0.68        | 0.27        |
| 30984-53-3    | 4.88           | 2.44        | 1.44        | 0.78        |
| 487-11-6      | 7.22           | 3.47        | 2.17        | 1.38        |
| 3840-17-3     | 5.63           | 2.82        | 1.82        | 0.97        |
| 42918-20-7    | 6.46           | 3.23        | 2.23        | 1.42        |
|               | R <sup>2</sup> |             |             |             |
| Free Catalyst | 0.000          | 0.001       | 0.001       | 0.002       |
| Cage Catalyst | 0.042          | 0.043       | 0.067       | 0.059       |
| Cage Effect   | 0.035          | 0.052       | 0.071       | 0.071       |

| CAS           | NPR1            | NPR2  | #Rotatable Bonds |
|---------------|-----------------|-------|------------------|
| 3524-73-0     | 0.31            | 0.91  | 5                |
| 3769-23-1     | 0.25            | 0.90  | 5                |
| 3404-61-3     | 0.39            | 0.82  | 5                |
| 111-66-0      | 0.24            | 0.90  | 6                |
| 691-37-2      | 0.31            | 0.85  | 4                |
| 762-62-9      | 0.41            | 0.97  | 1                |
| 3742-34-5     | 0.24            | 0.85  | 1                |
| 695-12-5      | 0.38            | 0.83  | 1                |
| 61142-41-4    | 0.35            | 0.78  | 1                |
| 3524-75-2     | 0.23            | 0.89  | 2                |
| 2114-42-3     | 0.23            | 0.88  | 2                |
| 3724-55-8     | 0.29            | 0.83  | 3                |
| 818-57-5      | 0.38            | 0.92  | 4                |
| 300-57-2      | 0.28            | 0.89  | 2                |
| 1736-60-3     | 0.44            | 0.66  | 2                |
| 768-56-9      | 0.14            | 0.91  | 3                |
| 591-87-7      | 0.18            | 0.88  | 3                |
| 1746-13-0     | 0.19            | 0.89  | 3                |
| 109-49-9      | 0.17            | 0.86  | 4                |
| 4810-05-3     | 0.31            | 0.76  | 5                |
| 2489-86-3     | 0.30            | 0.70  | 2                |
| 2489-87-4     | 0.21            | 0.87  | 2                |
| 4696-30-4     | 0.12            | 0.96  | 4                |
| 1587-04-8     | 0.40            | 0.75  | 3                |
| 3333-20-8     | 0.32            | 0.84  | 3                |
| 3333-13-9     | 0.22            | 0.93  | 3                |
| 140-67-0      | 0.17            | 0.93  | 4                |
| 3698-28-0     | 0.51            | 0.61  | 4                |
| 77446-17-4    | 0.40            | 0.72  | 4                |
| 24743-14-4    | 0.26            | 0.84  | 4                |
| 1737-16-2     | 0.21            | 0.93  | 2                |
| 1587-05-9     | 0.39            | 0.68  | 4                |
| 3840-33-3     | 0.31            | 0.84  | 4                |
| 1813-97-4     | 0.18            | 0.97  | 2                |
| 93-15-2       | 0.34            | 0.75  | 6                |
| 557-31-3      | 0.20            | 0.98  | 4                |
| 3739-64-8     | 0.14            | 1.00  | 6                |
| 30984-53-3    | 0.31            | 0.81  | 2                |
| 487-11-6      | 0.47            | 0.61  | 8                |
| 3840-17-3     | 0.27            | 0.84  | 2                |
| 42918-20-7    | 0.48            | 0.61  | 2                |
|               | Rs <sub>q</sub> |       |                  |
| Free Catalyst | 0.041           | 0.011 | 0.000            |
| Cage Catalyst | 0.048           | 0.006 | 0.004            |
| Cage Effect   | 0.001           | 0.000 | 0.003            |

| CAS           | ISF   | SphericityIndex | TPSA  |
|---------------|-------|-----------------|-------|
| 3524-73-0     | 0.01  | 0.46            | 0.00  |
| 3769-23-1     | 0.01  | 0.43            | 0.00  |
| 3404-61-3     | 0.01  | 0.30            | 0.00  |
| 111-66-0      | 0.01  | 0.28            | 0.00  |
| 691-37-2      | 0.01  | 0.44            | 0.00  |
| 762-62-9      | 0.01  | 0.61            | 0.00  |
| 3742-34-5     | 0.01  | 0.38            | 0.00  |
| 695-12-5      | 0.01  | 0.51            | 0.00  |
| 61142-41-4    | 0.00  | 0.38            | 0.00  |
| 3524-75-2     | 0.01  | 0.28            | 0.00  |
| 2114-42-3     | 0.01  | 0.32            | 0.00  |
| 3724-55-8     | 0.01  | 0.36            | 26.30 |
| 818-57-5      | 0.00  | 0.32            | 26.30 |
| 300-57-2      | 0.01  | 0.31            | 0.00  |
| 1736-60-3     | 0.00  | 0.31            | 0.00  |
| 768-56-9      | 0.01  | 0.13            | 0.00  |
| 591-87-7      | 0.01  | 0.20            | 26.30 |
| 1746-13-0     | 0.01  | 0.30            | 9.23  |
| 109-49-9      | 0.01  | 0.41            | 17.07 |
| 4810-05-3     | 0.00  | 0.18            | 0.00  |
| 2489-86-3     | 0.00  | 0.15            | 0.00  |
| 2489-87-4     | 0.00  | 0.19            | 0.00  |
| 4696-30-4     | 0.02  | 0.29            | 9.23  |
| 1587-04-8     | 0.00  | 0.28            | 0.00  |
| 3333-20-8     | 0.00  | 0.27            | 0.00  |
| 3333-13-9     | 0.01  | 0.26            | 0.00  |
| 140-67-0      | 0.01  | 0.23            | 9.23  |
| 3698-28-0     | 0.00  | 0.26            | 9.23  |
| 77446-17-4    | 0.00  | 0.24            | 0.00  |
| 24743-14-4    | 0.00  | 0.21            | 9.23  |
| 1737-16-2     | 0.01  | 0.31            | 0.00  |
| 1587-05-9     | 0.00  | 0.20            | 0.00  |
| 3840-33-3     | 0.00  | 0.24            | 0.00  |
| 1813-97-4     | 0.00  | 0.27            | 0.00  |
| 93-15-2       | 0.00  | 0.20            | 18.46 |
| 557-31-3      | 0.01  | 0.32            | 9.23  |
| 3739-64-8     | 0.02  | 0.20            | 9.23  |
| 30984-53-3    | 0.00  | 0.31            | 0.00  |
| 487-11-6      | 0.00  | 0.17            | 27.69 |
| 3840-17-3     | 0.00  | 0.31            | 0.00  |
| 42918-20-7    | 0.00  | 0.31            | 0.00  |
| Free Catalyst | 0.028 |                 |       |
| Cage Catlyst  | 0.005 |                 |       |
| Cage Effect   | 0.045 |                 |       |



DFT-optimized molecular geometries and related output.:

Program: ADF  
Functional B3LYP-TZ2P  
1-octene 111-66-0  
Alkene carbon atoms  
Outermost : 15  
Innermost: 14  
C next to C=C: 1  
IR C=C stretch 1698 cm<sup>-1</sup>  
Intensity: 20.13

|   |             |             |             |
|---|-------------|-------------|-------------|
| C | 1.15156726  | 0.31519828  | 0.15887983  |
| H | 0.12737013  | -0.06723023 | 0.08917287  |
| H | 1.78276221  | -0.52703243 | 0.47267020  |
| C | 1.22543337  | 1.40927726  | 1.23973664  |
| H | 2.24875285  | 1.80116858  | 1.28835573  |
| H | 0.58916249  | 2.24999979  | 0.94038917  |
| C | 0.80441663  | 0.91180845  | 2.62638992  |
| H | -0.22045136 | 0.52291085  | 2.57636640  |
| H | 1.43851666  | 0.06367632  | 2.91458370  |
| C | 0.88369172  | 1.99369484  | 3.70867766  |
| H | 0.24947046  | 2.84184847  | 3.42073997  |
| C | 0.46525331  | 1.49878478  | 5.09818833  |
| H | 1.90858730  | 2.38333502  | 3.75710433  |
| C | 1.60518843  | 0.79766451  | -1.19113024 |
| C | 0.85462760  | 0.82754722  | -2.29138242 |
| H | 2.63144372  | 1.16131183  | -1.24368359 |
| H | -0.17446465 | 0.47840208  | -2.28481719 |
| H | 1.24074630  | 1.19861119  | -3.23478658 |
| C | 0.54827370  | 2.58761042  | 6.17391522  |
| H | -0.10416926 | 3.43163064  | 5.92958458  |
| H | 1.56843870  | 2.97369310  | 6.26365525  |
| H | 0.24824473  | 2.20608215  | 7.15388155  |
| H | 1.09982834  | 0.65154136  | 5.38423735  |
| H | -0.55844752 | 1.10916456  | 5.04825786  |

5-methylhexene  
Cas: 3524-73-0  
IR stretch: 1696  
Intensity: 20.75  
Outermost: 15  
Innermost: 14  
C next to C=C: 1

|   |             |             |             |
|---|-------------|-------------|-------------|
| C | 0.87802888  | 0.42416259  | 0.05938651  |
| H | -0.20322217 | 0.39462528  | -0.10141651 |
| H | 1.18848446  | -0.59438533 | 0.32948180  |
| C | 1.22238432  | 1.36506165  | 1.22911279  |
| H | 2.31318568  | 1.45407232  | 1.29819567  |
| H | 0.84687339  | 2.37062650  | 1.00186308  |
| C | 0.67728717  | 0.91675631  | 2.59710248  |
| C | -0.85794884 | 0.86921657  | 2.62696240  |
| H | 1.05149616  | -0.09865458 | 2.78604015  |
| C | 1.20959032  | 1.83166852  | 3.70993164  |
| H | 0.86230186  | 2.86006269  | 3.56298265  |
| H | 0.86371178  | 1.50095689  | 4.69351478  |
| H | 2.30327989  | 1.84702845  | 3.72293023  |
| C | 1.56078682  | 0.82795886  | -1.21857088 |
| C | 0.94217032  | 1.19389260  | -2.34015409 |
| H | 2.65053329  | 0.83010774  | -1.19322786 |
| H | -0.14226765 | 1.21081838  | -2.40888609 |
| H | 1.49471120  | 1.48651388  | -3.22657701 |
| H | -1.27681754 | 1.85621394  | 2.40186255  |
| H | -1.21877405 | 0.57198191  | 3.61556587  |
| H | -1.26077090 | 0.15991709  | 1.90039293  |

4-methylhexene

Cas: 3769-23-1

IR stretch: 1696

Intensity: 16.94

Outermost: 15

Innermost: 14

C next to C=C: 1

|   |             |             |             |
|---|-------------|-------------|-------------|
| C | 1.13159689  | 0.33859428  | 0.11243856  |
| H | 0.05980540  | 0.11396003  | 0.13079776  |
| H | 1.65649815  | -0.59565680 | 0.35585687  |
| C | 1.44449051  | 1.36944724  | 1.22478439  |
| C | 2.94876760  | 1.66127601  | 1.32226059  |
| H | 0.92982663  | 2.30234721  | 0.95872120  |
| C | 0.86575518  | 0.87568518  | 2.56461663  |
| H | -0.18191426 | 0.59575027  | 2.40645228  |
| H | 1.38709426  | -0.04498741 | 2.85648874  |
| C | 0.93987034  | 1.89471959  | 3.70784265  |
| H | 0.45161875  | 2.83324388  | 3.42688022  |
| H | 0.43904958  | 1.51389312  | 4.60193104  |
| H | 1.97154024  | 2.12535089  | 3.98367325  |
| C | 1.51560598  | 0.78025269  | -1.27323654 |
| C | 0.65132428  | 1.04757185  | -2.25163823 |
| H | 2.57958206  | 0.89119677  | -1.47288937 |
| H | -0.42075724 | 0.94740453  | -2.10398447 |
| H | 0.98292942  | 1.37212659  | -3.23224474 |
| H | 3.34475041  | 2.04706371  | 0.38034593  |
| H | 3.50105045  | 0.74860741  | 1.57281001  |
| H | 3.16296503  | 2.40433203  | 2.09303049  |

3-methylhexene

Cas: 3404-61-3

IR stretch: 1697

Intensity: 16.88

Outermost: 15

Innermost: 14

C next to C=C: 1

|   |             |             |             |
|---|-------------|-------------|-------------|
| C | 1.05270629  | 0.26702069  | 0.16189371  |
| H | -0.03553594 | 0.12908084  | 0.13291327  |
| C | 1.70831353  | -1.09675329 | 0.45274571  |
| C | 1.37003516  | 1.31461887  | 1.25294677  |
| H | 2.45676567  | 1.46543127  | 1.29663893  |
| H | 0.93989568  | 2.27370063  | 0.94331881  |
| C | 0.84781911  | 0.96406885  | 2.65174820  |
| H | -0.22513497 | 0.74577583  | 2.58991485  |
| H | 1.32775348  | 0.04888610  | 3.01170464  |
| C | 1.08541212  | 2.09043290  | 3.66474225  |
| H | 0.58278978  | 3.01114037  | 3.35338543  |
| H | 0.71018850  | 1.82245148  | 4.65601816  |
| H | 2.15282229  | 2.31235081  | 3.76023286  |
| C | 1.49295892  | 0.77786482  | -1.18698959 |
| C | 0.68926143  | 1.02937678  | -2.21844943 |
| H | 2.56492355  | 0.94795113  | -1.29529413 |
| H | -0.38395894 | 0.87222059  | -2.15196652 |
| H | 1.07267336  | 1.39950345  | -3.16328516 |
| H | 2.79662235  | -0.99420652 | 0.51790607  |
| H | 1.48510486  | -1.80969942 | -0.34426540 |
| H | 1.35246426  | -1.51949496 | 1.39458110  |

4-methylpentene

Cas: 691-37-2

IR stretch 1697

Intensity 16.23

Outermost: 2

Innermost: 1

C next to C=C: 7

|   |             |             |             |
|---|-------------|-------------|-------------|
| C | 0.71187758  | 1.06046858  | -1.80148045 |
| C | 1.61682535  | 0.62917720  | -2.67842708 |
| H | -0.22976203 | 1.46465310  | -2.17356051 |
| H | 2.56718029  | 0.21440506  | -2.35392224 |
| H | 1.44170265  | 0.67689964  | -3.74791460 |
| H | -0.23458577 | 1.45766807  | 2.20780108  |
| C | 0.86303977  | 1.03694814  | -0.30611029 |
| C | -0.22382282 | 0.20686175  | 0.41555631  |
| C | -0.12967335 | 0.40341305  | 1.93512780  |
| H | -0.90952788 | -0.16056417 | 2.45455356  |
| H | 0.83870944  | 0.05485957  | 2.30990165  |
| C | -0.13345404 | -1.27947797 | 0.04582514  |
| H | 1.85266503  | 0.64735007  | -0.03873240 |
| H | 0.82492542  | -1.69731618 | 0.37348041  |
| H | -0.20952628 | -1.42884312 | -1.03354369 |
| H | -0.93017737 | -1.85244664 | 0.52854554  |
| H | 0.81462440  | 2.06684899  | 0.07138928  |
| H | -1.20062978 | 0.58281457  | 0.08364280  |

4,4'-dimethyl pen-1-ene

Cas: 762-62-9

IR stretch: 1696

Intensity: 14.2

Outermost: 2

Innermost: 1

C next to C=C: 7

|   |             |             |             |
|---|-------------|-------------|-------------|
| C | 0.73945717  | 1.03501855  | -1.85275231 |
| C | 1.59288405  | 0.43167490  | -2.67903241 |
| H | -0.11524410 | 1.55840152  | -2.27701603 |
| H | 2.46244535  | -0.10168532 | -2.30460999 |
| H | 1.45518552  | 0.45112560  | -3.75488093 |
| H | -0.01273512 | 1.53691197  | 2.21221840  |
| C | 0.86171976  | 1.05818192  | -0.35453173 |
| C | -0.26135825 | 0.30837796  | 0.42143392  |
| C | 0.00733218  | 0.48025866  | 1.92746913  |
| H | -0.74978886 | -0.04307815 | 2.51918494  |
| H | 0.98696809  | 0.07530246  | 2.19967396  |
| C | -0.23738640 | -1.18822854 | 0.06643935  |
| C | -1.64271044 | 0.89960816  | 0.08508812  |
| H | 0.73083291  | -1.63328234 | 0.31668390  |
| H | -0.41130046 | -1.34444566 | -1.00084706 |
| H | -1.01025690 | -1.72794407 | 0.62200425  |
| H | -1.67113090 | 1.97443026  | 0.29089408  |
| H | -2.41940982 | 0.42202394  | 0.68954968  |
| H | -1.90078647 | 0.74646280  | -0.96579112 |
| H | 1.82757939  | 0.62935192  | -0.06528818 |
| H | 0.86214094  | 2.10201234  | -0.01389735 |

vinyl cyclopentane

Cas: 3742-34-5

IR stretch: 1696

Intensity: 23.36

Outermost: 10

Innermost: 14

C next to C=C: 1

|   |             |             |             |
|---|-------------|-------------|-------------|
| C | 0.86540361  | 0.61446827  | 0.03721343  |
| H | 1.02216160  | -1.57807332 | 0.23173859  |
| C | 1.39932291  | -0.67153179 | 0.71004639  |
| C | 1.13482904  | 1.67917538  | 1.12438621  |
| H | 2.20084922  | 1.93414047  | 1.11188540  |
| H | 0.57699284  | 2.60264359  | 0.95347234  |
| C | 0.76361023  | 0.97761036  | 2.44968888  |
| H | -0.28446415 | 1.17116178  | 2.69434627  |
| C | 0.98310925  | -0.54615430 | 2.19607878  |
| C | 0.84602693  | 1.04018523  | -2.44570485 |
| H | 2.57940743  | 1.03848777  | -1.27348663 |
| H | -0.23293260 | 0.92573308  | -2.50397728 |
| H | 1.36715155  | 1.25954055  | -3.37131459 |
| C | 1.49565603  | 0.91653579  | -1.28903168 |
| H | 1.35804304  | 1.34857042  | 3.28766506  |
| H | 0.05859882  | -1.09894248 | 2.38225036  |
| H | 1.74138661  | -0.96710588 | 2.86025307  |
| H | 2.49128950  | -0.68737233 | 0.61981716  |
| H | -0.21958673 | 0.51775561  | -0.09656731 |

vinyl cyclohexane

Cas: 695-12-5

IR stretch: 1695

Intensity: 20.24

Outermost: 10

Innermost: 14

C next to C=C: 1

|   |             |             |             |
|---|-------------|-------------|-------------|
| C | 0.83075092  | 0.51854402  | -0.12075520 |
| H | 0.85073563  | -1.59285738 | -0.62267480 |
| C | 1.15949541  | -0.95422803 | 0.21043353  |
| C | 1.20575152  | 1.42856397  | 1.07022833  |
| H | 2.29652573  | 1.41361318  | 1.19442786  |
| H | 0.92965747  | 2.46210245  | 0.84029938  |
| C | 0.53874593  | 0.97018693  | 2.37515024  |
| H | -0.54881599 | 1.08327652  | 2.28201367  |
| C | 0.86740043  | -0.49621641 | 2.69025885  |
| C | 0.91998943  | 1.37748493  | -2.49128943 |
| H | 2.61437062  | 0.92524614  | -1.35091624 |
| H | -0.16326980 | 1.42704685  | -2.56192260 |
| H | 1.48289246  | 1.68311496  | -3.36675666 |
| C | 1.52467762  | 0.96011232  | -1.38032307 |
| H | 0.85137025  | 1.61649453  | 3.20147208  |
| H | 0.34893786  | -0.81445878 | 3.60026631  |
| H | 1.94246133  | -0.58933105 | 2.89067010  |
| H | 2.24851798  | -1.05962994 | 0.30195871  |
| H | -0.25318914 | 0.59686716  | -0.27912513 |
| C | 0.49266904  | -1.41179900 | 1.51577034  |
| H | -0.59691152 | -1.40210511 | 1.38556951  |
| H | 0.77280751  | -2.44695296 | 1.73545840  |



vinyl cyclooctane

Cas: 61142-41-4

IR stretch 1695

Intensity 19.48

Outermost: 10

Innermost: 14

C next to C=C: 1

|   |             |             |             |
|---|-------------|-------------|-------------|
| C | 0.83300696  | 0.57714933  | -0.54596274 |
| H | 1.12363534  | -1.16912457 | -1.74692600 |
| C | 0.98918175  | -0.95737091 | -0.68257410 |
| C | 1.17618838  | 1.14938765  | 0.84653622  |
| H | 2.23981352  | 0.96878344  | 1.04950482  |
| H | 1.06608923  | 2.23625404  | 0.77497710  |
| C | 0.34646597  | 0.65842323  | 2.04594039  |
| H | -0.71138951 | 0.60401573  | 1.76366348  |
| C | 0.78346762  | -0.67615470 | 2.70326260  |
| C | 1.26541688  | 2.07488804  | -2.53545106 |
| H | 2.76926829  | 1.06148475  | -1.49310989 |
| H | 0.20902517  | 2.30331855  | -2.64879038 |
| H | 1.94572287  | 2.53785674  | -3.24231244 |
| C | 1.70054889  | 1.26418422  | -1.57300136 |
| H | 0.40391201  | 1.44076842  | 2.80899125  |
| H | 0.81754021  | -0.52046950 | 3.78590764  |
| H | 1.81209919  | -0.91579335 | 2.40851130  |
| H | 1.92224091  | -1.26875113 | -0.19825738 |
| H | -0.21150963 | 0.83009423  | -0.76921718 |
| C | -0.12203468 | -1.89293349 | 2.44711157  |
| H | -1.16935981 | -1.57772121 | 2.53996684  |
| H | 0.04397942  | -2.62015943 | 3.25020096  |
| C | 0.06426515  | -2.63119168 | 1.11555202  |
| C | -0.19030552 | -1.82329458 | -0.16928115 |
| H | 1.07765357  | -3.05053628 | 1.07376419  |
| H | -0.61521078 | -3.49127284 | 1.12114560  |
| H | -1.08249266 | -1.20011839 | -0.03941735 |
| H | -0.44512945 | -2.53700312 | -0.95821103 |

## Allylcyclopentane

Cas: 3524-75-2

IR stretch: 1696

Intensity: 11.6

Outermost: 10

Innermost: 14

C next to C=C: 20

|   |             |             |             |
|---|-------------|-------------|-------------|
| C | 0.17366010  | -0.16599289 | -0.11755779 |
| H | 1.22055486  | -1.96719298 | 0.61688448  |
| C | 1.33623776  | -0.87986667 | 0.59807282  |
| C | 0.31696352  | 1.30571651  | 0.33927479  |
| H | 0.93428906  | 1.85205974  | -0.37831837 |
| H | -0.65238788 | 1.80892290  | 0.37521121  |
| C | 1.01594036  | 1.25710828  | 1.73081468  |
| H | 0.39298346  | 1.68328940  | 2.52039351  |
| C | 1.32517406  | -0.24083750 | 1.99633184  |
| C | 1.38331724  | 1.07386751  | -3.26065284 |
| H | 2.21550697  | -0.53814094 | -2.23344583 |
| H | 0.51533636  | 1.69348671  | -3.46979339 |
| H | 2.30134455  | 1.32415103  | -3.78160216 |
| C | 1.31827445  | 0.05285228  | -2.40723074 |
| H | 1.94117540  | 1.83844782  | 1.71030077  |
| H | 0.52468143  | -0.68961415 | 2.59366258  |
| H | 2.25882861  | -0.38807285 | 2.54421430  |
| H | 2.28322584  | -0.65362175 | 0.09619588  |
| H | -0.75726259 | -0.56507918 | 0.30476275  |
| C | 0.08759211  | -0.36211352 | -1.64713818 |
| H | -0.11027885 | -1.42324623 | -1.84599455 |
| H | -0.77550804 | 0.19570296  | -2.02640388 |

Allylcyclohexane

Cas: 2114-42-3

IR stretch: 1694

Intensity: 13.13

Outermost: 10

Innermost: 14

C next to C=C: 20

|   |             |             |             |
|---|-------------|-------------|-------------|
| C | 0.37741195  | -0.02995066 | 0.01878903  |
| H | 1.42660162  | -1.89089891 | 0.40875122  |
| C | 1.56341043  | -0.82057288 | 0.59973607  |
| C | 0.53502459  | 1.47050168  | 0.31685212  |
| H | 1.40747397  | 1.85256369  | -0.22622554 |
| H | -0.33335217 | 2.01730697  | -0.06730509 |
| C | 0.70874413  | 1.73722463  | 1.81945704  |
| H | -0.21264411 | 1.45548104  | 2.34519581  |
| C | 1.73108764  | -0.56427384 | 2.10479247  |
| C | 1.23171706  | 1.01880996  | -3.33003250 |
| H | 2.22274616  | -0.45844899 | -2.24234137 |
| H | 0.32179611  | 1.58366270  | -3.51393750 |
| H | 2.08879245  | 1.25385457  | -3.95212624 |
| C | 1.28798616  | 0.08029967  | -2.38620391 |
| H | 0.85570546  | 2.80742922  | 1.99696028  |
| H | 0.85168051  | -0.94925931 | 2.63672271  |
| H | 2.59576014  | -1.11645479 | 2.48691787  |
| H | 2.48538029  | -0.52285268 | 0.08609428  |
| H | -0.52741967 | -0.37549722 | 0.53831481  |
| C | 0.14627737  | -0.30833543 | -1.48603043 |
| H | -0.04987353 | -1.38210592 | -1.60602605 |
| H | -0.75893871 | 0.21823789  | -1.80770735 |
| C | 1.88268264  | 0.93525114  | 2.40064569  |
| H | 1.96022742  | 1.10333043  | 3.47956719  |
| H | 2.81935551  | 1.29562606  | 1.95668589  |

3-butenic acid methyl ester

Cas: 3724-55-8

IR stretch: 1706

Intensity: 13.36

Outermost: 2

Innermost: 1

C next to C=C: 7

|   |             |             |             |
|---|-------------|-------------|-------------|
| C | 0.73930990  | 0.94100289  | -1.89573691 |
| C | 1.82083281  | 0.76945027  | -2.65147595 |
| H | -0.24233672 | 1.01400824  | -2.35530855 |
| H | 2.81282778  | 0.67882525  | -2.21762182 |
| H | 1.75131713  | 0.71299850  | -3.73209146 |
| O | -1.26656846 | -0.28192426 | -0.22697088 |
| C | 0.76681184  | 1.04370534  | -0.39604300 |
| C | -0.26351905 | 0.15329669  | 0.28510548  |
| O | 0.07519041  | -0.06601446 | 1.57533850  |
| H | 0.52403423  | 2.06913737  | -0.08247685 |
| H | 1.75746147  | 0.82528936  | 0.00830850  |
| C | -0.85413086 | -0.85477878 | 2.34362591  |
| H | -0.97568671 | -1.84192194 | 1.89584266  |
| H | -1.82641910 | -0.36181632 | 2.38680759  |
| H | -0.42063701 | -0.93503478 | 3.33795614  |

4-pentenoic acid methyl ester

Cas: 818-57-5

IR stretch 1701

Intensity 15.65

Outermost: 2

Innermost: 1

C next to C=C: 7

|   |             |             |             |
|---|-------------|-------------|-------------|
| C | 1.07259559  | 0.83146856  | -1.07598248 |
| C | 1.62948417  | 0.15350789  | -2.07763515 |
| H | 1.06117785  | 1.92042646  | -1.11319056 |
| H | 1.65792466  | -0.93261608 | -2.08056718 |
| H | 2.07720642  | 0.65898831  | -2.92630301 |
| O | -2.29267775 | -1.10089730 | 1.51296621  |
| C | 0.42731662  | 0.21101206  | 0.13236802  |
| C | -1.70140673 | -0.04781642 | 1.46248029  |
| O | -1.47444841 | 0.73245927  | 2.54636810  |
| H | 0.91657169  | 0.58099872  | 1.04040591  |
| H | 0.55382191  | -0.87500836 | 0.10986535  |
| C | -1.96768321 | 0.22577099  | 3.80045605  |
| H | -1.50895786 | -0.73739720 | 4.02909452  |
| H | -3.05084930 | 0.10208157  | 3.76157710  |
| H | -1.69359124 | 0.96760793  | 4.54739893  |
| C | -1.08156847 | 0.55076723  | 0.21697059  |
| H | -1.21305617 | 1.63554889  | 0.23042793  |
| H | -1.60240721 | 0.13963027  | -0.64842145 |

Hex-5-en-2-one  
Cas: 109-49-9  
IR stretch 1699  
Intensity 20.21  
Outermost: 15  
Innermost: 14  
C next to C=C: 1

|   |             |             |             |
|---|-------------|-------------|-------------|
| C | 1.01858804  | 0.36225000  | 0.09990235  |
| H | -0.06218487 | 0.20676441  | 0.04752774  |
| H | 1.45716247  | -0.60479134 | 0.36758538  |
| C | 1.33945220  | 1.36418871  | 1.21604486  |
| H | 2.41893920  | 1.56164211  | 1.26269862  |
| H | 0.88056894  | 2.33859641  | 1.00909251  |
| C | 0.90261933  | 0.91060343  | 2.60544275  |
| H | -0.28295551 | 0.97280214  | -2.28166842 |
| H | 1.23907901  | 1.40693139  | -3.24003926 |
| C | 1.06523887  | 1.93447928  | 3.71773194  |
| H | 0.37395508  | 2.76690145  | 3.54910560  |
| H | 0.85214212  | 1.47652571  | 4.68301993  |
| H | 2.07588173  | 2.35328364  | 3.71316260  |
| C | 1.54488399  | 0.81576589  | -1.23368887 |
| C | 0.79806253  | 1.08037843  | -2.30455002 |
| H | 2.62602644  | 0.93727620  | -1.30293109 |
| O | 0.45040703  | -0.19599940 | 2.81262865  |

Allylacetate  
Cas: 591-87-7  
IR stretch 1708  
Intensity 4.31  
Outermost: 2  
Innermost: 1  
C next to C=C: 6

|   |             |             |             |
|---|-------------|-------------|-------------|
| C | 0.92120148  | 0.29701860  | -1.67383597 |
| C | 1.27445836  | 1.21050585  | -2.57446767 |
| H | 1.49424657  | -0.62171571 | -1.56961978 |
| H | 0.71928134  | 2.13701517  | -2.69001192 |
| H | 2.12479802  | 1.06273092  | -3.23064865 |
| C | -0.27156975 | 0.42832256  | -0.77930400 |
| O | 0.17354805  | 0.26077106  | 0.59157677  |
| C | -0.79832938 | 0.26659812  | 1.53465144  |
| C | -0.20913936 | 0.08805409  | 2.91596501  |
| O | -1.97222496 | 0.40280027  | 1.28254981  |
| H | -1.01929441 | -0.34182278 | -0.99178602 |
| H | -0.75398561 | 1.40251407  | -0.88591268 |
| H | -1.01037177 | 0.05308532  | 3.65120736  |
| H | 0.46527808  | 0.91890713  | 3.13722325  |
| H | 0.38000519  | -0.83085062 | 2.95415905  |

Allylphenylether

Cas: 1746-13-0

IR stretch 1708

Intensity 5.66

Outermost: 2

Innermost: 1

C next to C=C: 6

|   |             |             |             |
|---|-------------|-------------|-------------|
| C | 0.93588061  | 0.35511750  | -1.65177517 |
| C | 0.95426593  | 1.09018630  | -2.76024237 |
| H | 1.56305142  | -0.52912077 | -1.56500533 |
| H | 0.34294679  | 1.98261879  | -2.85979121 |
| H | 1.57715295  | 0.82556585  | -3.60731058 |
| C | 0.06067505  | 0.64440094  | -0.46966457 |
| O | 0.88150878  | 0.67161637  | 0.70044200  |
| C | 0.27665741  | 0.84423835  | 1.91380183  |
| C | -1.09752652 | 1.04650299  | 2.09090149  |
| C | -1.60896166 | 1.21426001  | 3.38238802  |
| C | -0.77088932 | 1.18428137  | 4.49380114  |
| C | 0.60186108  | 0.98351094  | 4.30768917  |
| C | 1.12489560  | 0.81449858  | 3.03105056  |
| H | -1.77059317 | 1.07752580  | 1.24438490  |
| H | -2.67496813 | 1.37035572  | 3.50997269  |
| H | -1.17606995 | 1.31527673  | 5.49066491  |
| H | 1.26796195  | 0.95812013  | 5.16362050  |
| H | 2.18579129  | 0.65806129  | 2.87218739  |
| H | -0.69806327 | -0.14312922 | -0.35906020 |
| H | -0.45728742 | 1.60286484  | -0.59521708 |



allylbenzene

Cas: 300-57-2

IR stretch 1696

Intensity 16.75

Outermost: 2

Innermost: 6

C next to C=C: 1

|   |             |             |             |
|---|-------------|-------------|-------------|
| C | 0.45867605  | -0.57488402 | -1.43961683 |
| C | 0.55026152  | 1.14530892  | -3.27842643 |
| H | 1.88677482  | 1.09425538  | -1.66690088 |
| H | -0.30928006 | 0.71086492  | -3.78144727 |
| H | 1.00094751  | 2.01695561  | -3.74043099 |
| C | 1.02901233  | 0.62784093  | -2.14874248 |
| H | 1.21375637  | -1.36797348 | -1.40352962 |
| H | -0.38786852 | -0.96578393 | -2.01413058 |
| C | 0.01717237  | -0.25855429 | -0.01918579 |
| C | -0.99005296 | 0.68795092  | 0.21345839  |
| C | -1.40243772 | 0.98695996  | 1.51101083  |
| C | -0.80784041 | 0.34719587  | 2.60208834  |
| C | 0.19910689  | -0.59247127 | 2.38286998  |
| C | 0.60653292  | -0.89135243 | 1.08018474  |
| H | -1.44591853 | 1.19647932  | -0.63026178 |
| H | -2.18563724 | 1.72018706  | 1.67254109  |
| H | -1.12687659 | 0.58083184  | 3.61213073  |
| H | 0.66838943  | -1.09372029 | 3.22288821  |
| H | 1.38990590  | -1.62516679 | 0.91644541  |

Homoallylmethyl ether

Cas: 4696-30-4

IR stretch 1694

Intensity 18.8

Outermost: 15

Innermost: 14

C next to C=C: 1

|   |             |             |             |
|---|-------------|-------------|-------------|
| C | 1.01283228  | 0.38007797  | 0.12710680  |
| H | -0.06760614 | 0.21562257  | 0.08828078  |
| H | 1.47509841  | -0.55988630 | 0.45082891  |
| C | 1.32114009  | 1.44034473  | 1.18462396  |
| H | 2.40249559  | 1.64973531  | 1.21128343  |
| H | 0.81167528  | 2.38310695  | 0.93346321  |
| O | 0.88574258  | 0.96872866  | 2.44897217  |
| H | 1.21795468  | 1.26934291  | -3.25740584 |
| H | -0.29935220 | 0.88511888  | -2.27045732 |
| C | 1.11761701  | 1.89619615  | 3.49125012  |
| H | 0.58420834  | 2.84099236  | 3.31392155  |
| H | 0.75168836  | 1.44959766  | 4.41619460  |
| H | 2.18892307  | 2.11822441  | 3.59994414  |
| C | 1.53503632  | 0.76981816  | -1.22857548 |
| C | 0.78177760  | 0.98745804  | -2.30522691 |
| H | 2.61565065  | 0.88440929  | -1.30949694 |

pentafluoroallylbenzene

Cas: 1736-60-3

IR stretch: 1698

Intensity: 13.59

Outermost: 2

Innermost: 6

C next to C=C: 1

|   |             |             |             |
|---|-------------|-------------|-------------|
| C | 0.17127817  | -0.59680027 | -1.52197124 |
| C | 0.86958175  | 1.18810615  | -3.15084895 |
| H | 2.12098154  | 0.44409252  | -1.64134456 |
| H | -0.09938487 | 1.16756431  | -3.64101710 |
| H | 1.60407382  | 1.88409427  | -3.54061092 |
| C | 1.14426663  | 0.39613960  | -2.11807784 |
| H | 0.60328011  | -1.60115565 | -1.55588852 |
| H | -0.75078994 | -0.61002360 | -2.10448309 |
| C | -0.15255979 | -0.26151652 | -0.07849074 |
| C | -1.26590406 | 0.50732976  | 0.26244570  |
| C | -1.55940533 | 0.84483272  | 1.58204121  |
| C | -0.71665481 | 0.41213911  | 2.60449207  |
| C | 0.40700054  | -0.35329829 | 2.29735343  |
| C | 0.67131750  | -0.67553008 | 0.96845856  |
| F | -2.09760580 | 0.94127179  | -0.70145791 |
| F | -2.64002812 | 1.57903894  | 1.87442289  |
| F | -0.98485524 | 0.72972743  | 3.87483576  |
| F | 1.21982441  | -0.76980829 | 3.27618432  |
| F | 1.76480220  | -1.41398630 | 0.69873690  |

3-buten-1-yl benzene

Cas: 768-56-9

IR stretch 1697

Intensity 19.88

Outermost: 2

Innermost: 6

C next to C=C: 1

|   |             |             |             |
|---|-------------|-------------|-------------|
| C | -1.33741378 | -0.47152910 | 0.03847251  |
| C | 0.06416613  | -1.07206621 | -1.96656678 |
| H | -1.10818296 | 0.65382211  | -1.84676708 |
| H | 0.41545043  | -1.98861368 | -1.50038553 |
| H | 0.43435141  | -0.85507574 | -2.96275217 |
| C | -0.78457340 | -0.25673083 | -1.34258211 |
| H | -1.00287811 | -1.43569317 | 0.43333617  |
| H | -2.43282173 | -0.50880822 | -0.00326762 |
| C | -1.52601601 | 0.45731214  | 2.39491873  |
| C | -0.83568509 | -0.25951112 | 3.38049605  |
| C | -1.40365530 | -0.48323763 | 4.63561631  |
| C | -2.67760215 | 0.00823311  | 4.92582012  |
| C | -3.37620036 | 0.72532803  | 3.95256828  |
| C | -2.80328067 | 0.94594283  | 2.69953533  |
| H | 0.15723378  | -0.64201092 | 3.16293282  |
| H | -0.85091691 | -1.03773425 | 5.38681675  |
| H | -3.11999089 | -0.16226881 | 5.90137560  |
| H | -4.36497032 | 1.11552104  | 4.17016251  |
| H | -3.35157398 | 1.50789890  | 1.94890966  |
| C | -0.92941724 | 0.65425758  | 1.01992492  |
| H | -1.25024862 | 1.61757884  | 0.61050979  |
| H | 0.16197439  | 0.68510901  | 1.08608272  |

2-allyltoluene  
Cas: 1587-04-8  
IR stretch 1694  
Intensity 18.80  
Outermost: 2  
Innermost: 6  
C next to C=C: 1

|   |             |             |             |
|---|-------------|-------------|-------------|
| C | 0.94589735  | 1.11741502  | -1.28361854 |
| C | 1.95992466  | -0.55837045 | -2.86882747 |
| H | -0.08814135 | -0.44673197 | -2.46103756 |
| H | 2.96165961  | -0.17650796 | -2.69220035 |
| H | 1.86571937  | -1.38997274 | -3.55857453 |
| C | 0.89771504  | -0.02877831 | -2.26576348 |
| H | 0.40346649  | 1.97291661  | -1.69922308 |
| H | 1.98407966  | 1.43334300  | -1.15026640 |
| C | 0.35182540  | 0.73665316  | 0.06337007  |
| C | -1.02391718 | 0.88444035  | 0.33213536  |
| C | -1.51307904 | 0.48460450  | 1.58242255  |
| C | -0.67241278 | -0.05408797 | 2.55607390  |
| C | 0.68754222  | -0.20180824 | 2.28631256  |
| C | 1.18642988  | 0.19231251  | 1.04564929  |
| H | -1.94310242 | 0.92098586  | -1.63657959 |
| H | -2.57187003 | 0.59939027  | 1.79395117  |
| H | -1.07741531 | -0.35508252 | 3.51632389  |
| H | 1.35414381  | -0.61908690 | 3.03342683  |
| H | 2.24384044  | 0.07369067  | 0.82872346  |
| C | -1.96908228 | 1.47223132  | -0.69272378 |
| H | -1.71309323 | 2.51201096  | -0.92169378 |
| H | -2.99637178 | 1.45644606  | -0.32372382 |

3-allyltoluene  
Cas: 3333-20-8  
IR stretch 1696  
Intensity 16.07  
Outermost: 2  
Innermost: 6  
C next to C=C: 1

|   |             |             |             |
|---|-------------|-------------|-------------|
| C | 0.64181910  | 0.97199347  | -1.58054800 |
| C | 2.34129594  | -0.53730015 | -2.66921835 |
| H | 0.33732965  | -1.06720478 | -2.37109639 |
| H | 3.12909631  | 0.20253485  | -2.55655761 |
| H | 2.61247302  | -1.47599476 | -3.14007810 |
| C | 1.09986519  | -0.29946658 | -2.25023956 |
| H | -0.12865576 | 1.44973177  | -2.19582436 |
| H | 1.48202518  | 1.67170685  | -1.51962300 |
| C | 0.07343499  | 0.72399876  | -0.19187327 |
| C | -1.27125193 | 0.98561223  | 0.09322605  |
| C | -1.81667611 | 0.75602951  | 1.36221225  |
| C | -0.97775906 | 0.25115859  | 2.36369183  |
| C | 0.36468057  | -0.01660069 | 2.09568121  |
| C | 0.88904672  | 0.21436922  | 0.82436103  |
| H | -1.90998686 | 1.37995778  | -0.69262735 |
| H | -1.37775441 | 0.06609893  | 3.35623089  |
| H | -3.37769735 | 1.78260466  | 2.45044035  |
| H | 1.00363286  | -0.40889470 | 2.88017244  |
| H | 1.93074332  | -0.00712556 | 0.61537771  |
| C | -3.27338321 | 1.04390843  | 1.65008839  |
| H | -3.79638210 | 0.13907734  | 1.97403415  |
| H | -3.78448521 | 1.43025103  | 0.76639220  |

4-allyltoluene  
Cas: 3333-13-9  
IR stretch 1696  
Intensity 18.97  
Outermost: 2  
Innermost: 6  
C next to C=C: 1

|   |             |             |             |
|---|-------------|-------------|-------------|
| C | 0.71372088  | 0.95428937  | -1.67100241 |
| C | 2.50167503  | -0.56794594 | -2.58564437 |
| H | 0.48517834  | -1.10885314 | -2.42351736 |
| H | 3.27297999  | 0.18247388  | -2.43546237 |
| H | 2.81490663  | -1.51662361 | -3.00778466 |
| C | 1.23042122  | -0.33048062 | -2.26809471 |
| H | -0.01464900 | 1.40520638  | -2.35415105 |
| H | 1.54092770  | 1.66548644  | -1.57274823 |
| C | 0.04777890  | 0.74355221  | -0.32031139 |
| C | -1.30116879 | 1.05379682  | -0.11639902 |
| C | -1.90501916 | 0.85461754  | 1.12493494  |
| C | -1.18085158 | 0.33791769  | 2.20649125  |
| C | 0.16852031  | 0.02640074  | 1.99905055  |
| C | 0.77207309  | 0.22201697  | 0.75718266  |
| H | -1.88625286 | 1.45755810  | -0.93743380 |
| H | -2.95416121 | 1.10449395  | 1.25420647  |
| H | -1.13882503 | -0.28429069 | 4.27744640  |
| H | 0.75423924  | -0.37726210 | 2.81948933  |
| H | 1.81666764  | -0.03970209 | 0.62000558  |
| C | -1.84181519 | 0.12539837  | 3.54990025  |
| H | -2.68523065 | -0.56699717 | 3.46931552  |
| H | -2.23187327 | 1.06589849  | 3.95064697  |

2-Allylanisole  
Cas: 3698-28-0  
IR stretch: 1695  
Intensity: 19.79  
Outermost: 2  
Innermost: 6  
C next to C=C: 1

|   |             |             |             |
|---|-------------|-------------|-------------|
| C | 1.24521336  | 1.15257912  | -1.27393934 |
| C | 1.91153999  | -0.58538545 | -2.97056192 |
| H | -0.06973818 | 0.01032312  | -2.63047248 |
| H | 2.96371816  | -0.48314597 | -2.71895344 |
| H | 1.65951567  | -1.30437719 | -3.74250209 |
| C | 0.97569292  | 0.13826672  | -2.35976427 |
| H | 0.92617073  | 2.14052879  | -1.62346685 |
| H | 2.31896641  | 1.20121349  | -1.07525607 |
| C | 0.51090443  | 0.82436259  | 0.01251045  |
| C | -0.86753752 | 1.09493887  | 0.13709042  |
| C | -1.55065035 | 0.77709479  | 1.31516433  |
| C | -0.86481815 | 0.18177243  | 2.37812395  |
| C | 0.49447113  | -0.09486416 | 2.27048527  |
| C | 1.16699541  | 0.22888575  | 1.08838267  |
| O | -1.45998059 | 1.67561021  | -0.95297561 |
| H | -2.60763922 | 0.98641422  | 1.41413671  |
| H | -1.40359508 | -0.06172243 | 3.28755095  |
| H | 1.02919929  | -0.55575368 | 3.09323697  |
| H | 2.22722934  | 0.01444386  | 0.99588617  |
| C | -2.84202798 | 1.99478729  | -0.88448898 |
| H | -3.04699608 | 2.70706972  | -0.07794405 |
| H | -3.45139989 | 1.09670255  | -0.73583949 |
| H | -3.09634772 | 2.44913874  | -1.84085997 |



3-allylanisole  
Cas: 2907-1-18  
IR stretch 1696  
Intensity 12.10  
Outermost: 2  
Innermost: 6  
C next to C=C: 1

|   |             |             |             |
|---|-------------|-------------|-------------|
| C | 0.79043072  | 1.07171383  | -1.60709673 |
| C | 2.51120619  | -0.46890954 | -2.61509084 |
| H | 0.46212470  | -0.89664097 | -2.55163558 |
| H | 3.32101029  | 0.21545381  | -2.37742744 |
| H | 2.77953508  | -1.39249029 | -3.11646404 |
| C | 1.24767005  | -0.18377943 | -2.30666361 |
| H | 0.11714691  | 1.63097617  | -2.26566778 |
| H | 1.65597466  | 1.71375901  | -1.41250081 |
| C | 0.06591595  | 0.77646814  | -0.30325114 |
| C | -1.27385694 | 1.11642054  | -0.14076643 |
| C | -1.94859825 | 0.83867451  | 1.05847793  |
| C | -1.27108218 | 0.21307037  | 2.10898089  |
| C | 0.07603509  | -0.12884543 | 1.94054826  |
| C | 0.74268021  | 0.14270588  | 0.75195118  |
| O | -3.26141670 | 1.21671672  | 1.10285650  |
| H | -1.76864444 | -0.01031228 | 3.04330621  |
| H | -3.55752797 | 1.48786163  | 3.14969861  |
| H | 0.60153721  | -0.61591069 | 2.75533998  |
| H | 1.78283561  | -0.13949422 | 0.63013124  |
| C | -3.99438406 | 0.96300099  | 2.29295260  |
| H | -4.03901639 | -0.10943519 | 2.51255573  |
| H | -5.00135696 | 1.33728425  | 2.11542058  |
| H | -1.82398330 | 1.60529684  | -0.93793431 |

4-allylanisole  
Cas: 140-67-0  
IR stretch 1696  
Intensity 21.85  
Outermost: 2  
Innermost: 6  
C next to C=C: 1

|   |             |             |             |
|---|-------------|-------------|-------------|
| C | 0.66877879  | 0.96033704  | -1.62142274 |
| C | 2.43500682  | -0.46527208 | -2.71614620 |
| H | 0.45681516  | -1.08672217 | -2.42162792 |
| H | 3.18806219  | 0.30937662  | -2.59953388 |
| H | 2.74953062  | -1.38860188 | -3.19034874 |
| C | 1.18354170  | -0.28545391 | -2.29761175 |
| H | -0.12842633 | 1.40082366  | -2.23063341 |
| H | 1.47427622  | 1.70100562  | -1.56886385 |
| C | 0.12085267  | 0.68603597  | -0.23032215 |
| C | -1.21302605 | 0.93115864  | 0.09127079  |
| C | -1.72095898 | 0.67818991  | 1.37125165  |
| C | -0.87592479 | 0.16658355  | 2.35971800  |
| C | 0.46922397  | -0.08871858 | 2.05067924  |
| C | 0.95227488  | 0.16571528  | 0.77510697  |
| O | -1.26276349 | -0.11552184 | 3.64045221  |
| H | -2.76302925 | 0.88321898  | 1.57847948  |
| H | -2.70779806 | -0.16624101 | 5.04625368  |
| H | 1.11360122  | -0.48798198 | 2.82592167  |
| H | 1.99190741  | -0.04781318 | 0.54750431  |
| C | -2.61590076 | 0.12247580  | 4.00037653  |
| H | -3.30158448 | -0.48143773 | 3.39558058  |
| H | -2.87735895 | 1.18094577  | 3.89150351  |
| H | -1.88058572 | 1.33085565  | -0.66623429 |

3-(3,5-Dimethylphenyl)-1-propene

Cas: 77446-17-4

IR stretch 1695

Intensity 16.18

Outermost: 2

Innermost: 6

C next to C=C: 1

|   |             |             |             |
|---|-------------|-------------|-------------|
| C | 0.64769800  | 0.96930500  | -1.58015200 |
| C | 2.32679400  | -0.56705700 | -2.66330500 |
| H | 0.31722000  | -1.07063000 | -2.35748300 |
| H | 3.12364600  | 0.16396700  | -2.55707300 |
| H | 2.58553900  | -1.51183000 | -3.12899700 |
| C | 1.08929300  | -0.31148600 | -2.24304700 |
| H | -0.11772500 | 1.45250800  | -2.19741500 |
| H | 1.49653000  | 1.65887200  | -1.52405400 |
| C | 0.07709500  | 0.73506800  | -0.18995000 |
| C | -1.26780900 | 0.98977100  | 0.08862400  |
| C | -1.80251200 | 0.76429700  | 1.36353700  |
| C | -0.95690600 | 0.27598600  | 2.36375500  |
| C | 0.39578400  | 0.00986800  | 2.11500700  |
| C | 0.89688700  | 0.24161600  | 0.83136000  |
| H | -1.91164200 | 1.37205800  | -0.69865300 |
| H | -1.35840800 | 0.09747000  | 3.35833000  |
| H | -3.36763400 | 1.78507500  | 2.45257900  |
| C | 1.28659400  | -0.52009500 | 3.21684200  |
| H | 1.94011200  | 0.02811800  | 0.61726600  |
| C | -3.26059400 | 1.04115200  | 1.65744900  |
| H | -3.77387800 | 0.13418900  | 1.99080200  |
| H | -3.77972100 | 1.41607900  | 0.77352300  |
| H | 2.30725800  | -0.67413700 | 2.86226700  |
| H | 0.91376900  | -1.47541400 | 3.59843700  |
| H | 1.32311100  | 0.17414400  | 4.06182400  |

3-(2,4,6-trimethylphenyl)-1-propene

Cas: 4810-05-3

IR stretch 1693

Intensity 21.55

Outermost: 2

Innermost: 6

C next to C=C: 1

|   |             |             |             |
|---|-------------|-------------|-------------|
| C | 1.84743050  | -0.33289985 | -0.15722163 |
| C | 3.35765335  | -0.09955874 | 1.85224639  |
| H | 1.63813457  | -1.28993211 | 1.82530919  |
| H | 4.01979918  | 0.58314233  | 1.32691642  |
| H | 3.61446776  | -0.34067427 | 2.87794081  |
| C | 2.28250905  | -0.61765278 | 1.26157564  |
| H | 1.92979124  | -1.25213026 | -0.74437732 |
| H | 2.53559181  | 0.38582813  | -0.60771935 |
| C | 0.41737078  | 0.18265849  | -0.21920861 |
| C | -0.65815518 | -0.71382252 | -0.38991179 |
| C | -1.96590946 | -0.22249576 | -0.41224786 |
| C | -2.24572372 | 1.13958841  | -0.26688393 |
| C | -1.17022577 | 2.01117015  | -0.09384887 |
| C | 0.15387014  | 1.55664566  | -0.06453151 |
| C | -0.42444446 | -2.20105495 | -0.55477724 |
| H | -2.78708286 | -0.92183693 | -0.54539326 |
| H | -3.71302642 | 2.72534363  | -0.16612936 |
| H | -1.36214096 | 3.07384886  | 0.02523562  |
| C | 1.27563747  | 2.55195418  | 0.13605507  |
| C | -3.67168663 | 1.64214690  | -0.29511021 |
| H | -4.26684774 | 1.18456947  | 0.50107137  |
| H | -4.15751195 | 1.39652684  | -1.24436934 |
| H | 0.13532772  | -2.42037699 | -1.46986623 |
| H | -1.37503407 | -2.73465309 | -0.61153936 |
| H | 0.14626062  | -2.62063383 | 0.27830354  |
| H | 1.94919196  | 2.57744866  | -0.72686790 |
| H | 1.88131626  | 2.29858729  | 1.01000059  |
| H | 0.87667644  | 3.55836936  | 0.27654395  |

3-(1-Naphthyl)-1-propene

Cas: 2489-86-3

IR stretch 1696

Intensity 14.12

Outermost: 2

Innermost: 6

C next to C=C: 1

|   |             |             |             |
|---|-------------|-------------|-------------|
| C | 0.85293200  | 0.76099900  | -1.62047400 |
| C | 2.24575000  | -0.28000800 | -3.45137000 |
| H | 0.37941400  | -1.01188700 | -2.84793300 |
| H | 3.03780700  | 0.45353600  | -3.32629300 |
| H | 2.39173400  | -1.03167300 | -4.21914700 |
| C | 1.14807800  | -0.25564700 | -2.69909100 |
| H | 0.02389300  | 1.39388100  | -1.95559300 |
| H | 1.71612700  | 1.42041700  | -1.48923300 |
| C | 0.44938100  | 0.12715100  | -0.30027000 |
| C | -0.87832300 | 0.12086900  | 0.07701000  |
| C | -1.30790800 | -0.47974100 | 1.28440800  |
| C | -0.39554500 | -1.07363300 | 2.12179700  |
| C | 3.28105800  | -1.70932700 | 2.30875400  |
| C | 3.71344200  | -1.11892300 | 1.09734900  |
| C | 2.80800400  | -0.52767000 | 0.24508500  |
| C | 1.41988900  | -0.48976900 | 0.55605600  |
| C | 0.98487200  | -1.09228400 | 1.78474900  |
| C | 1.94642900  | -1.69511400 | 2.64081900  |
| H | -1.61383800 | 0.59159400  | -0.56815900 |
| H | -2.36099800 | -0.46379700 | 1.54408300  |
| H | -0.71396600 | -1.53395700 | 3.05166500  |
| H | 4.00431100  | -2.17258800 | 2.97127300  |
| H | 4.76669100  | -1.13610800 | 0.83811200  |
| H | 3.15609100  | -0.09678600 | -0.68400900 |
| H | 1.60555900  | -2.14586200 | 3.56760300  |

3-(2-Naphthyl)-1-propene

Cas: 2489-87-4

IR stretch 1699

Intensity 17.04

Outermost: 2

Innermost: 6

C next to C=C: 1

|   |             |             |             |
|---|-------------|-------------|-------------|
| C | -1.77044600 | 1.54009900  | -1.10028400 |
| C | -1.19123900 | 2.12374800  | -3.47920900 |
| H | -1.59224000 | 0.17614400  | -2.82522800 |
| H | -1.09049900 | 3.17840000  | -3.23823600 |
| H | -1.02205700 | 1.83748800  | -4.51151800 |
| C | -1.51162900 | 1.22640900  | -2.54917800 |
| H | -2.79691100 | 1.24809400  | -0.84841200 |
| H | -1.71207800 | 2.62410600  | -0.94561800 |
| C | 0.48817700  | 0.58258600  | -0.45828800 |
| C | -0.82639400 | 0.84119600  | -0.13203100 |
| C | -1.29677300 | 0.46885600  | 1.15792100  |
| C | -0.46743000 | -0.13354900 | 2.07349100  |
| C | 3.08791700  | -1.27812000 | 2.33049100  |
| C | 3.56940300  | -0.91377300 | 1.04809000  |
| C | 2.73331500  | -0.31006600 | 0.13655300  |
| C | 1.37573600  | -0.03926900 | 0.46076900  |
| C | 0.89070200  | -0.40678900 | 1.75771800  |
| C | 1.77870400  | -1.03007300 | 2.67530300  |
| H | 0.86411400  | 0.85739100  | -1.43867900 |
| H | -2.33302500 | 0.66509900  | 1.41633000  |
| H | -0.84452300 | -0.41265200 | 3.05242900  |
| H | 3.75702600  | -1.75378700 | 3.03946800  |
| H | 4.60327200  | -1.11371800 | 0.78752700  |
| H | 3.10117400  | -0.03119300 | -0.84587200 |
| H | 1.40655700  | -1.30786400 | 3.65652000  |

Allylethylether

CAS: 557-31-3

IR stretch 1705

Intensity 4.37

Outermost: 15

Innermost: 14

C next to C=C: 1

|   |             |             |             |
|---|-------------|-------------|-------------|
| C | 1.00834798  | 0.45838461  | 0.37280304  |
| H | -0.06423322 | 0.22093443  | 0.30836072  |
| H | 1.52988341  | -0.46142137 | 0.68825742  |
| O | 1.23734025  | 1.48142584  | 1.33187572  |
| H | 0.58366146  | 3.14960487  | 3.29704655  |
| H | 0.84203479  | 1.98824129  | 4.61353257  |
| C | 0.84505561  | 1.10639478  | 2.64534449  |
| H | -0.22737424 | 0.85775403  | 2.65688216  |
| H | 1.39222592  | 0.20132875  | 2.95180619  |
| H | -0.20134893 | 0.51645941  | -2.10932960 |
| H | 1.26041831  | 1.16205583  | -3.04058616 |
| H | 2.20296947  | 2.49422444  | 3.59348061  |
| C | 1.13682754  | 2.25627579  | 3.59553704  |
| C | 1.52929047  | 0.90202051  | -0.96193263 |
| C | 0.82936320  | 0.85955918  | -2.09270022 |
| H | 2.55637252  | 1.26065097  | -0.96430332 |

Allylbutylether

CAS: 3739-64-8

IR stretch 1705

Intensity 4.41

Outermost: 15

Innermost: 14

C next to C=C: 1

|   |             |             |             |
|---|-------------|-------------|-------------|
| C | 0.96715897  | 0.48901730  | 0.34597496  |
| H | -0.12355048 | 0.37167144  | 0.25925540  |
| H | 1.36981885  | -0.46118737 | 0.73667894  |
| O | 1.28764145  | 1.54029113  | 1.24606288  |
| C | 1.18058805  | 3.43278758  | 5.82200616  |
| H | -0.32528627 | 2.16198471  | 4.93360900  |
| C | 0.82206213  | 1.29907996  | 2.56571357  |
| H | -0.27398304 | 1.18709182  | 2.56228897  |
| H | 1.24350697  | 0.35368487  | 2.94357070  |
| C | 1.23168851  | 2.45679481  | 3.46434195  |
| H | 0.81746891  | 3.38428689  | 3.05455826  |
| H | 1.17399869  | 1.33319877  | 5.30933756  |
| H | 2.32199540  | 2.55773328  | 3.43251707  |
| C | 1.57273068  | 0.78074995  | -0.99492208 |
| C | 0.90516828  | 0.73688893  | -2.14500772 |
| H | 2.63302853  | 1.02414006  | -0.98318574 |
| H | -0.15642316 | 0.50765787  | -2.17636796 |
| H | 1.39457942  | 0.92455788  | -3.09442625 |
| C | 0.76553946  | 2.27038656  | 4.91317303  |
| H | 2.26897278  | 3.54314554  | 5.84431483  |
| H | 0.83836960  | 3.27860646  | 6.84885178  |
| H | 0.75896165  | 4.37779175  | 5.46645490  |



2-4-dimethylphenyl-prop-1-ene

CAS: 3840-33-3

IR stretch 1694

Intensity 19.33

Outermost: 2

Innermost: 6

C next to C=C: 1

|   |             |             |             |
|---|-------------|-------------|-------------|
| C | 0.85918000  | 1.00258400  | -1.60221100 |
| C | 2.20334500  | -0.75931800 | -2.81379600 |
| H | 0.13505600  | -0.87477600 | -2.50977600 |
| H | 3.13073400  | -0.21166900 | -2.66992600 |
| H | 2.26688000  | -1.70019500 | -3.34951800 |
| C | 1.04305300  | -0.29419600 | -2.35534100 |
| H | 0.23660100  | 1.67483900  | -2.20355000 |
| H | 1.82892500  | 1.49291900  | -1.47876300 |
| C | 0.18031600  | 0.79372800  | -0.25878500 |
| C | -1.19910600 | 0.99822100  | -0.14037600 |
| C | -1.86901900 | 0.77961200  | 1.06062400  |
| C | -1.16947200 | 0.34739200  | 2.19284200  |
| C | 0.20910300  | 0.14846500  | 2.07201900  |
| C | 0.89939600  | 0.35949400  | 0.87144200  |
| H | 2.77275900  | -0.20565700 | 1.77754100  |
| H | -2.94009500 | 0.94932700  | 1.11881200  |
| H | -1.19413600 | -0.21804400 | 4.28084900  |
| H | 0.76959100  | -0.18369800 | 2.94173300  |
| C | 2.39147200  | 0.12534500  | 0.80967700  |
| C | -1.88658200 | 0.10807400  | 3.50254800  |
| H | -2.65828300 | -0.66018500 | 3.39424400  |
| H | -2.38292100 | 1.01841700  | 3.85215400  |
| H | 2.64412000  | -0.63162900 | 0.06271800  |
| H | -1.75743700 | 1.33821500  | -1.00795300 |
| H | 2.92735500  | 1.03919600  | 0.53277200  |

2-6-dimethylphenyl-prop-1-ene

CAS: 1587-05-9

IR stretch 1694

Intensity 19.13

Outermost: 2

Innermost: 6

C next to C=C: 1

|   |             |             |             |
|---|-------------|-------------|-------------|
| C | 0.88487800  | 1.00580100  | -1.58348000 |
| C | 2.12642100  | -0.82146400 | -2.80452800 |
| H | 0.05323200  | -0.81267800 | -2.52844200 |
| H | 3.08444200  | -0.33513700 | -2.64283700 |
| H | 2.13741000  | -1.75826300 | -3.35073700 |
| C | 0.99170400  | -0.28920000 | -2.35494900 |
| H | 0.34397100  | 1.73698200  | -2.19102300 |
| H | 1.88521200  | 1.41377900  | -1.42352100 |
| C | 0.16463600  | 0.81669700  | -0.25643600 |
| C | -1.23129200 | 0.99905200  | -0.17523300 |
| C | -1.88011500 | 0.79093600  | 1.04743700  |
| C | -1.16669800 | 0.40454500  | 2.17887700  |
| C | 0.21074100  | 0.22003700  | 2.09337000  |
| C | 0.88966200  | 0.41869100  | 0.88581800  |
| C | -2.04326500 | 1.42045400  | -1.38204400 |
| H | -2.95456000 | 0.93314700  | 1.10807300  |
| H | 2.91693900  | 1.12417600  | 0.57491300  |
| H | 0.77112500  | -0.08534000 | 2.97148400  |
| C | 2.38566300  | 0.20070400  | 0.82767200  |
| H | 2.76089500  | -0.14520400 | 1.79273500  |
| H | 2.65134000  | -0.54183400 | 0.07093200  |
| H | -1.68137900 | 0.24597000  | 3.12064500  |
| H | -1.75812100 | 2.41885800  | -1.72948500 |
| H | -3.10685100 | 1.44592900  | -1.13754900 |
| H | -1.90973100 | 0.73709600  | -2.22513900 |

4-trifluoromethylphenyl-prop-1-ene

CAS: 1587-05-9

IR stretch 1694

Intensity 19.13

Outermost: 2

Innermost: 6

C next to C=C: 1

|   |             |             |             |
|---|-------------|-------------|-------------|
| C | 0.69251296  | 0.94029285  | -1.68013788 |
| C | 2.51325652  | -0.56586757 | -2.55017979 |
| H | 0.50147618  | -1.13309446 | -2.41849952 |
| H | 3.27146539  | 0.19651489  | -2.39427191 |
| H | 2.84616358  | -1.51323628 | -2.95961542 |
| C | 1.23381472  | -0.34416025 | -2.25655777 |
| H | -0.04183575 | 1.37102245  | -2.36908378 |
| H | 1.50667209  | 1.66687079  | -1.58590715 |
| C | 0.03202242  | 0.73915730  | -0.32600176 |
| C | -1.30056485 | 1.10391668  | -0.10786701 |
| C | -1.90002183 | 0.92242227  | 1.13773943  |
| C | -1.16454242 | 0.37056069  | 2.18735089  |
| C | 0.16704714  | -0.00270492 | 1.98393345  |
| C | 0.75484329  | 0.18006418  | 0.73620243  |
| H | -1.87673953 | 1.53771651  | -0.91866967 |
| H | -2.93216025 | 1.21322813  | 1.29266583  |
| F | -0.93701061 | 0.13972008  | 4.54417821  |
| H | 0.73920786  | -0.43023427 | 2.79839548  |
| H | 1.78573929  | -0.11890539 | 0.57961859  |
| C | -1.82458451 | 0.12571903  | 3.52268395  |
| F | -2.44354081 | -1.08413573 | 3.56340765  |
| F | -2.77197376 | 1.05157494  | 3.80250339  |

4-Allyl-1,2-dimethoxybenzene

CAS: 93-15-2

IR stretch 1694

Intensity 19.13

Outermost: 2

Innermost: 6

C next to C=C: 1

|   |             |             |             |
|---|-------------|-------------|-------------|
| C | 0.72872358  | 0.83946593  | -1.51153593 |
| C | 2.02267100  | -1.13269652 | -2.39681670 |
| H | -0.06880814 | -1.05258157 | -2.32273387 |
| H | 2.97422891  | -0.64579383 | -2.20139843 |
| H | 2.05925976  | -2.12515970 | -2.83274874 |
| C | 0.86619349  | -0.53277357 | -2.11995164 |
| H | 0.19011716  | 1.49268461  | -2.20650519 |
| H | 1.72474280  | 1.27468852  | -1.37332493 |
| C | -0.01879579 | 0.82577712  | -0.18678851 |
| C | -1.16304694 | 1.59593593  | 0.00887179  |
| C | -1.82987835 | 1.56836174  | 1.23818508  |
| C | -1.36664425 | 0.78282873  | 2.28599668  |
| C | -0.19974931 | 0.00392723  | 2.10168876  |
| C | 0.45202403  | 0.02849774  | 0.86800763  |
| O | -2.01402624 | 0.82651128  | 3.49830056  |
| H | -2.72014011 | 2.16484976  | 1.40462518  |
| H | -3.17677108 | -0.16446054 | 4.83366617  |
| O | 0.21716233  | -0.72735365 | 3.17685746  |
| H | 1.33759833  | -0.57355387 | 0.70836676  |
| C | -2.70364255 | -0.37012796 | 3.87378424  |
| H | -2.01278168 | -1.20978805 | 3.97720902  |
| H | -3.47342987 | -0.61537074 | 3.13314996  |
| H | -1.54054970 | 2.22032690  | -0.79402645 |
| C | 1.40639067  | -1.49425054 | 3.04764063  |
| H | 2.26660098  | -0.85696679 | 2.81643612  |
| H | 1.30582102  | -2.25897600 | 2.26983764  |
| H | 1.56154063  | -1.97609271 | 4.01167505  |

## References

- 1 G. te Velde, F. M. Bickelhaupt, E. J. Baerends, C. Fonseca Guerra, S. J. A. van Gisbergen, J. G. Snijders and T. Ziegler, *J Comput. Chem.*, 2001, **22**, 931–967.
- 2 C. F. Guerra, J. G. Snijders, G. Velde and E. J. Baerends, *Theor. Chem. Accounts Theory, Comput Model*, 1998, 391–403.
- 3 A. D. Becke, *Physical Review A*, 1988, **38**, 3098–3100.
- 4 C. Lee, W. Yang and R. Parr G., *Phys. Rev. B*, 1988, **37**, 785–789.
- 5 E. Van Lenthe, E. J. Baerends and J. G. Snijders, *J. Chem. Phys.*, 1993, **99**, 4597–4610.
- 6 E. van Lenthe, E. J. Baerends and J. G. Snijders, *J. Chem. Phys.*, 1994, **101**, 9783–9792.

- 7 E. van Lenthe, A. Ehlers and E. Baerends, *J. Chem. Phys.*, 1999, **110**, 8943–8953.
- 8 Verloop. A, *In Drug Design*, Academic Press: New York, 1976.
- 9 RDKit: Open-source cheminformatics, <http://www.rdkit.org> (accessed Jan 2023)\_
